# Supplementary material for: Suppression of cGMP-Dependent Photoreceptor Cytotoxicity With Mycophenolate Is Neuroprotective in Murine Models of Retinitis Pigmentosa
Source: PubMed Central journal article supplement — Invest Ophthalmol Vis Sci. 2020 Aug 12;61(10):25. doi: 10.1167/iovs.61.10.25 (PMC7441375; doi:10.1167/iovs.61.10.25), 2020-08-12
Supplement: iovs-61-10-25_s001.pdf [file iovs-61-10-25_s001.pdf]

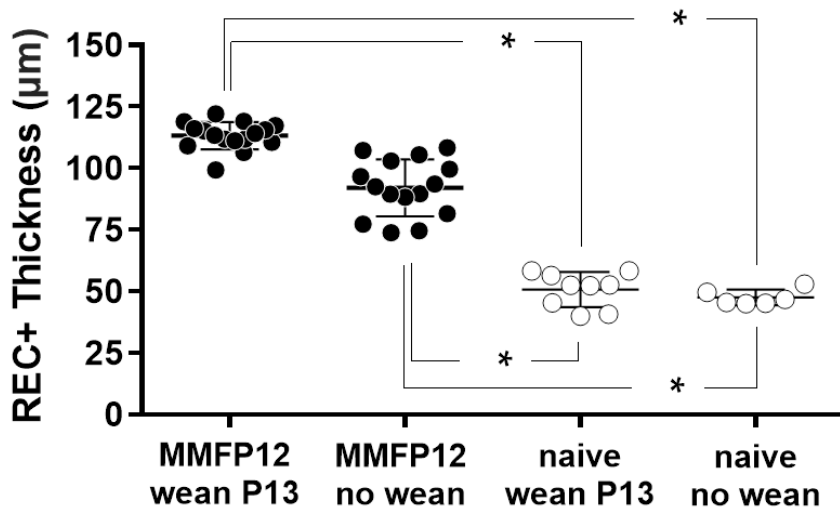

**Figure S1: Early Wean in rd10 Mice**

In naïve rd10 mice, outer retinal thickness (REC+) at P22 was not significantly different between those that were early-weaned at P13 vs not weaned ( $50.7 \pm 2.35$  vs  $47.5 \pm 1.29$  micron,  $n = 9$  and  $6$ ,  $p > 0.999$ ). In rd10 mice treated with MMF beginning at P12 (MMFP12), the REC+ was significantly thicker than naïve rd10 mice, either with early-weaning ( $113.2 \pm 1.38$  micron,  $n = 16$ ,  $p < 0.0001$ ) or without ( $92.1 \pm 3.0$  micron,  $n = 15$ ,  $p = 0.0065$ ). Early weaned MMFP12-treated mice tended to have greater REC+ than MMFP12-treated mice that were not early weaned, but it was not significant ( $p = 0.11$ ). asterisk,  $p \leq 0.05$ .
