# Supplementary material for: Suppression of cGMP-Dependent Photoreceptor Cytotoxicity With Mycophenolate Is Neuroprotective in Murine Models of Retinitis Pigmentosa
Source: PubMed Central journal article supplement — Invest Ophthalmol Vis Sci. 2020 Aug 12;61(10):25. doi: 10.1167/iovs.61.10.25 (PMC7441375; doi:10.1167/iovs.61.10.25), 2020-08-12
Supplement: iovs-61-10-25_s002.pdf [file iovs-61-10-25_s002.pdf]

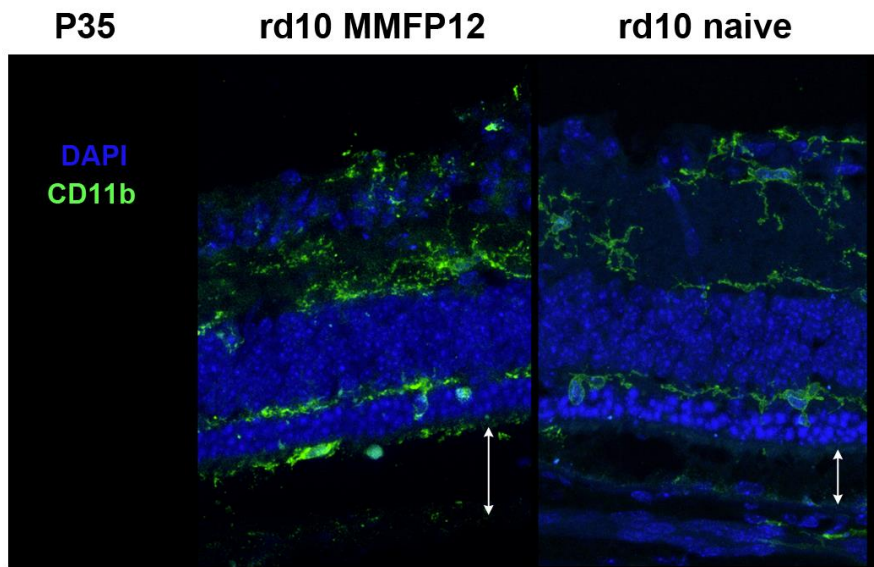

**Figure S2: Effect of MMF on Microglia in rd10 Mice at P35**

Immunostaining of CD11b 1:1000 (green) showed that microglia at P35 in rd10 mice treated with MMF beginning at P12 (MMFP12) and naïve rd10 mice both showed a similar activated phenotype. Infiltrating microglia develop an amoeboid morphology and migrate into the outer retina and subretinal space (white arrows). P, postnatal day.
