# Supplementary material for: Suppression of cGMP-Dependent Photoreceptor Cytotoxicity With Mycophenolate Is Neuroprotective in Murine Models of Retinitis Pigmentosa
Source: PubMed Central journal article supplement — Invest Ophthalmol Vis Sci. 2020 Aug 12;61(10):25. doi: 10.1167/iovs.61.10.25 (PMC7441375; doi:10.1167/iovs.61.10.25), 2020-08-12
Supplement: iovs-61-10-25_s003.pdf [file iovs-61-10-25_s003.pdf]

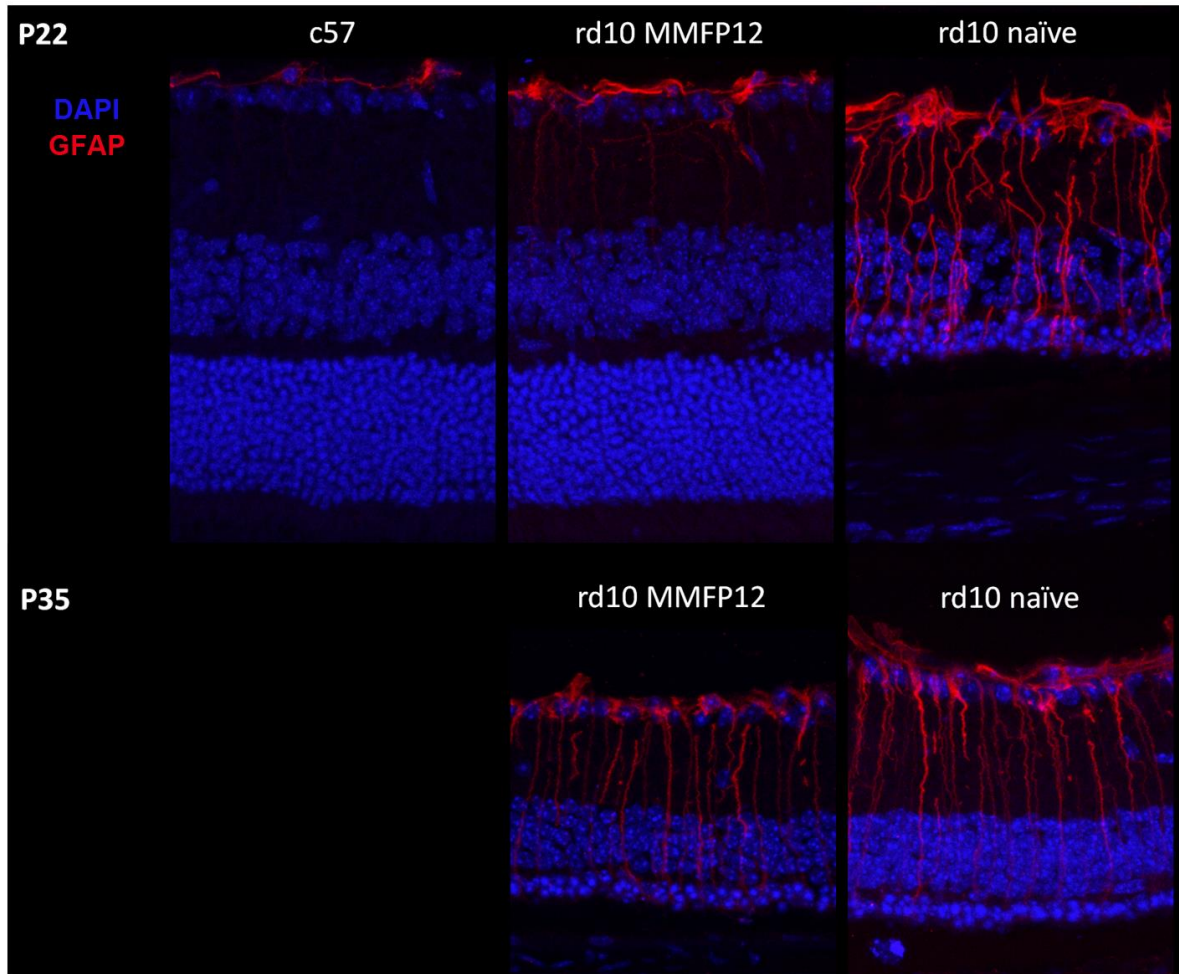

**Figure S3: Effect of MMF on Mueller Cell Activation in rd10 Mice**

At P22, immunostaining of GFAP 1:50,000 (red) showed predominant staining of the Mueller cell footplates, indicating the Mueller cells are in the resting state in both c57 mice and MMFP12-treated rd10 mice as compared with extensive GFAP upregulation of activated Mueller cells in naïve rd10. However, by P35, GFAP was upregulated similarly in the Mueller cells of both MMFP12-treated rd10 and naïve rd10 mice. P, postnatal day; GFAP, glial fibrillary acidic protein.
