# Supplementary material for: Suppression of cGMP-Dependent Photoreceptor Cytotoxicity With Mycophenolate Is Neuroprotective in Murine Models of Retinitis Pigmentosa
Source: PubMed Central journal article supplement — Invest Ophthalmol Vis Sci. 2020 Aug 12;61(10):25. doi: 10.1167/iovs.61.10.25 (PMC7441375; doi:10.1167/iovs.61.10.25), 2020-08-12
Supplement: iovs-61-10-25_s004.pdf [file iovs-61-10-25_s004.pdf]

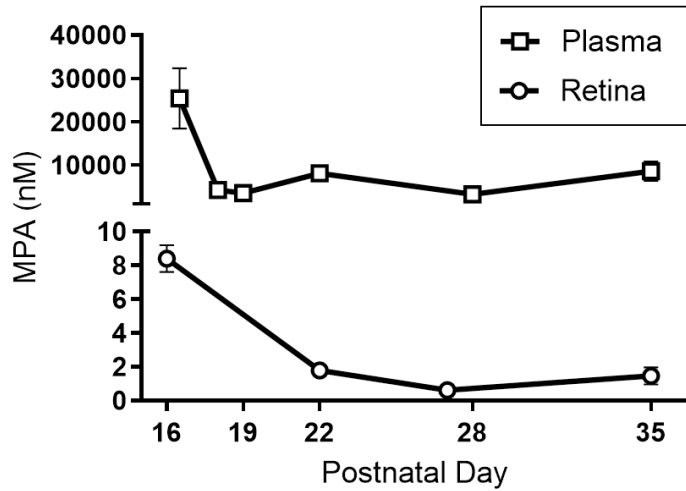

**Figure S4: Whole Retinal and Plasma Levels of MPA**

In rd10 mice treated with MMF beginning at P12 (MMFP12), whole retinal levels of MPA quantified by LC-MS showed that the retinal concentration was about 3000-4000 times lower than the concentration in plasma, and there was a relative decline in both plasma and retinal MPA levels after P16. P, postnatal day; MMF, mycophenolate mofetil; MPA, mycophenolic acid.
